# Supplementary material for: Effects of different fertilizers on nutrient quality and mineral elements in different economic forage groups in Qilian Mountain alpine meadows
Source: PeerJ. 2022 Oct 20;10:e14223. doi: 10.7717/peerj.14223 (PMC9588304; doi:10.7717/peerj.14223)
Supplement: Supplemental Information 1 [file peerj-10-14223-s001.xlsx]

## Sheet: cu
			Cu concent（mg/kg)
			Rep!	Trt!	Cut!	Gramineae	Leguminosae	Sedges	Wilted grass	Weeds
			1	K	2	11.9319	15.6874	16.8172	15.2402	17.3507
			2	K	2	8.90057	17.4108	12.158	10.8727	16.9735
			3	K	2	9.50291	18.3842	11.0476	13.3101	18.052
			4	K	2	10.1118	18.1609	13.3409	13.8174	17.0266
			1	N	2	10.8153	15.2528	16.1879	15.7071	18.5269
			2	N	2	11.0787	13.2632	13.806	15.8117	16.7468
			3	N	2	12.378	16.927	16.1879	14.235	20.6497
			4	N	2	11.424	15.5682	18.5698	17.0745	18.1843
			1	Zn	2	10.8472	18.1225	11.5123	11.7944	16.8134
			2	Zn	2	10.2958	21.7668	13.0263	12.2471	17.4146
			3	Zn	2	11.3428	17.9969	11.3881	12.966	18.1477
			4	Zn	2	10.9031	14.1015	10.1227	10.1702	14.8779
			1	B	2	10.6177	16.739	13.8704	21.5771	16.4586
			2	B	2	11.6918	15.7252	14.5108	13.3086	16.9767
			3	B	2	11.2081	13.2113	10.9429	14.4023	13.6525
			4	B	2	11.3149	21.2804	16.1574	16.4293	18.7466
			1	Cu	2	13.3469	16.4359	15.3041	8.233	22.2823
			2	Cu	2	17.1236	21.2103	13.3915	11.119	24.9979
			3	Cu	2	11.6098	14.0809	12.031	11.0495	19.5668
			4	Cu	2	11.3074	14.0166	12.8395	10.1338	22.2823
			1	P	2	11.0762	12.6489	30.0231	15.1201	14.4784
			2	P	2	10.1453	12.1589	26.3697	13.6171	14.4696
			3	P	2	11.4398	13.6207	18.6644	15.5688	13.9966
			4	P	2	11.6436	12.1671	30.4215	16.1744	14.9689
			1	Se	2	11.9261	10.0779	11.5277	16.0001	16.694
			2	Se	2	12.9503	12.9182	10.4022	17.5251	16.7117
			3	Se	2	12.1751	15.7675	14.9953	18.2041	19.8872
			4	Se	2	14.7498	12.9212	9.18552	18.371	13.4831
			1	Mo	2	14.6414	16.2446	12.5513	12.1141	14.9364
			2	Mo	2	14.1785	19.7939	11.3655	12.0061	17.2997
			3	Mo	2	10.4821	17.7015	13.7371	13.3769	13.6244
			4	Mo	2	13.1007	17.066	12.5513	10.9595	13.8851
			1	CK	2	5.7663	9.79304	13.4293	11.1952	6.20643
			2	CK	2	6.24881	8.09922	14.0299	11.7406	4.99029
			3	CK	2	4.27551	5.07558	10.2024	11.7406	4.99029
			4	CK	2	5.02091	9.42904	12.5539	12.2861	3.77415

## Sheet: P
				Pconcent（%）
			Rep!	Trt!	Cut!	Gramineae	Leguminosae	Sedges	Wilted grass	Weeds
			1	K	2	0.154108	0.326908	0.136438	0.240443	0.840409
			2	K	2	0.219833	0.210395	0.135012	0.245951	0.587354
			3	K	2	0.206714	0.23965	0.112844	0.281626	0.87823
			4	K	2	0.134397	0.219531	0.112476	0.413692	0.588904
			1	N	2	0.243522	0.32435	0.318073	0.316979	0.426871
			2	N	2	0.39362	0.31315	0.361818	0.342702	0.592675
			3	N	2	0.244717	0.346761	0.34021	0.359833	0.51941
			4	N	2	0.192286	0.325997	0.364207	0.392986	0.395166
			1	Zn	2	0.0844485	0.185004	0.107528	0.264831	0.24949
			2	Zn	2	0.0917309	0.185725	0.099034	0.281144	0.275935
			3	Zn	2	0.0704805	0.217765	0.162813	0.268226	0.275327
			4	Zn	2	0.124666	0.190869	0.173318	0.305638	0.258781
			1	B	2	0.089949	0.258945	0.0844485	0.109988	0.217996
			2	B	2	0.0858168	0.227921	0.0808911	0.133381	0.263951
			3	B	2	0.0859612	0.264162	0.0808643	0.15437	0.304015
			4	B	2	0.082118	0.243834	0.0777422	0.168574	0.260101
			1	Cu	2	0.0757643	0.222944	0.0896562	0.213517	0.289223
			2	Cu	2	0.0870008	0.200192	0.0919669	0.188552	0.382338
			3	Cu	2	0.0934696	0.178963	0.108094	0.237422	0.378826
			4	Cu	2	0.0799357	0.305706	0.111876	0.189781	0.26857
			1	P	2	0.139752	0.414634	0.176215	0.220832	0.311366
			2	P	2	0.130043		0.275935	0.248013	0.307437
			3	P	2	0.105524	0.399223	0.235854	0.274258	0.26691
			4	P	2	0.117479	0.383812	0.25373	0.284543	0.343019
			1	Se	2	0.188666	0.291939	0.261002	0.228803	0.265354
			2	Se	2	0.17589	0.282895	0.247287	0.200578	0.215978
			3	Se	2	0.191809	0.282946	0.30705	0.237779	0.192854
			4	Se	2	0.166932	0.28136	0.347491	0.208767	0.337364
			1	Mo	2	0.144453	0.198452	0.15821	0.250261	0.278213
			2	Mo	2	0.0964272	0.173659	0.143911	0.168816	0.209566
			3	Mo	2	0.0883902	0.141693	0.159244	0.192286	0.239493
			4	Mo	2	0.101454	0.171197	0.148009	0.147031	0.247082
			1	CK	2	0.132841	0.234363	0.1713	0.472178	0.504273
			2	CK	2	0.139568	0.222116	0.21982	0.340149	0.459063
			3	CK	2	0.131656	0.201776	0.218199	0.360031	0.583327
			4	CK	2	0.144453	0.211172	0.211587	0.260101	0.465151

## Sheet: Se
				Se content（ng/g)
			Rep!	Trt!	CUT!	Gramineae	Leguminosae	Sedges	Wilted grass	Weeds
			1	1	2	506.584	601.076	549.184	1228.33	729.007
			2	1	2	536.038	669.57	417.972	938.913	548.131
			3	1	2	430.739		680.397	1144.72	622.255
			4	1	2	670.79	738.064	549.184	1103.99	633.131
			1	2	2	551.747	422.336	579.611	1131.8	880.565
			2	2	2	765.762	468.656	579.611	1072.14	808.733
			3	2	2	612.564	565.161	472.997	915.27	736.902
			4	2	2	666.018	418.472	686.225	1169.34	986.064
			1	3	2	520.183	482.932	871.418		580.201
			2	3	2	668.263	434.096	1053.53		670.059
			3	3	2	569.952	516.404	1015.01	702.153	610.72
			4	3	2	521.41	632.185	1274.16	612.181	819.256
			1	4	2	693.521	539.954	726.453	1606.35	992.577
			2	4	2	732.708	591.245	712.222
			3	4	2	668.263	670.523	716.541	1799.51
			4	4	2	679.592	563.259	710.947	794.879	962.569
			1	5	2	503.935	551.989	557.068	979.838	720.604
			2	5	2	553.827	418.222	574.096	1228.52	743.192
			3	5	2	618.219	485.105	775.322	1173.7	939.287
			4	5	2	558.661	439.225	565.582	1127.35	801.028
			1	6	2	567.193	401.172	561.061	604.226	718.268
			2	6	2	551.842	460.483	524.016	446.11	493.02
			3	6	2	448.603	580.485	620.2	532.589	596.721
			4	6	2	522.546	399.792	775.523	527.642	578.874
			1	7	2	909.641	480.542	686.653	1269.89	730.837
			2	7	2	1069.78	429.547	559.715	1559.57	816.659
			3	7	2	897.802	549.653	813.591	1014.35	1092.55
			4	7	2	1401.91	462.425	686.653	1235.74	626.594
			1	8	2	519.426	589.566	1064.5	912.59	606.458
			2	8	2	567.956	512.186	1008.68	1072.32	644.041
			3	8	2	663.135	487.766	952.863	1111.03	599.05
			4	8	2	521.306	459.225		1193.34	726.614
			1	9	2	592.069	471.827	702.864	624.933	603.817
			2	9	2	565.385	564.488	402.657	748.857	504.227
			3	9	2	552.489	387.923	449.141	520.996	518.523
			4	9	2	458.333	463.071	518.221	604.945	542.189

## Sheet: Zn
	Zn content（mg/kg)
	Rep!	Trt!	CUT!	Gramineae	Leguminosae	Sedges	Wilted grass	Weeds
	1	1	2	50.6166	41.9519	76.8694	57.0289	57.2933
	2	1	2	43.3709	49.814	64.0692	66.5384	69.5753
	3	1	2	47.7848	50.2486	65.7285	74.0207	63.4343
	4	1	2	47.2574	49.3793	68.889	59.056	61.7298
	1	2	2	49.5667	51.6633	52.3397	36.5162	76.077
	2	2	2	38.0292	61.2289	50.6441	44.5584	67.6935
	3	2	2	40.1142	57.647	47.2642	64.4237	70.0613
	4	2	2	32.7466	56.8464	59.1108	48.4994	66.4133
	1	3	2	36.6015	59.0337	54.246	51.3778	73.8623
	2	3	2	38.0292	61.2289	50.6441	44.5584	67.6935
	3	3	2	39.1446	68.0991	60.9834	62.1652	88.2993
	4	3	2	42.8032	47.7733	51.1104	52.7005	65.5941
	1	4	2	57.485	50.03	57.5221	43.9347	75.3833
	2	4	2	69.2373	53.4676	45.4064	36.9406	88.1402
	3	4	2	54.7758	43.457	48.372	46.7554	81.5287
	4	4	2	48.4419	66.9157	78.7881	38.1081	81.0627
	1	5	2	54.3265	49.6339	52.7961	64.0558	56.9039
	2	5	2	49.0455	41.7144	56.9677	64.0558	67.9197
	3	5	2	59.4659	50.7581	50.3314	64.8491	62.8052
	4	5	2	75.0256	56.4293	51.0892	63.2625	63.5919
	1	6	2	42.8975	52.2436	50.0018	53.6516	77.7284
	2	6	2	54.5291	44.5654	43.4598	33.3448	59.2235
	3	6	2	57.6277	52.7388	49.8919	49.9191	71.4935
	4	6	2	63.062	61.4074	56.2142	62.761	77.5287
	1	7	2	38.6355	34.243	43.0315	65.3565	84.9289
	2	7	2	41.4696	36.0423	49.4684	66.7256	89.7996
	3	7	2	54.9778	61.1552	57.161	64.6537	81.9427
	4	7	2	45.0276	43.8135	48.2127	64.6902	83.0445
	1	8	2	47.841	41.5235	42.7812	54.5028	73.5367
	2	8	2	42.3104	45.7047	43.0142	62.2181	72.3485
	3	8	2	53.3716	44.8842	49.4517	73.8337	69.0688
	4	8	2	47.841	47.4243	62.5597	58.3178	79.1929
	1	9	2	42.9523	47.2151	62.0849	72.9158	81.5742
	2	9	2	54.0746	50.4162	51.6677	65.5003	66.8904
	3	9	2	68.7405	53.4922	57.9031	65.6086	77.135
	4	9	2	60.4172	50.5415	59.9565	58.4096	82.9404

## Sheet: CP
		CP concent（%）
		rep!	Trt!	CUT!	Gramineae	Leguminosae	Sedges	Wilted grass	Weeds
		1	1	2	11.18	24.201	13.6957	7.4009	15.7003
		2	1	2	10.3066	21.7556	13.5416	6.0746	12.4668
		3	1	2	10.5323	21.9025	12.3871	6.465	13.0096
		4	1	2	13.5319	22.4439	15.0779	10.8743	13.9952
		1	2	2	14.0072	24.2046	14.1269	9.2725	15.273
		2	2	2	12.3901	17.5871	13.4706	10.3566	14.2094
		3	2	2	12.9481	22.1748	13.7813	9.0124	12.7816
		4	2	2	12.9121	21.2283	14.9848	10.9929	14.855
		1	3	2	11.0171	22.6771	12.4965	7.6277	11.9132
		2	3	2	11.7585	22.2707	13.1561	7.7112	12.3993
		3	3	2	11.5456	21.3333	12.3256	9.4652	13.4863
		4	3	2	12.574	22.9224	13.2604	6.9675	10.9666
		1	4	2	12.5078	24.8445	13.7875	8.2962	13.8377
		2	4	2	10.677	20.4587	10.3545	6.9196	13.163
		3	4	2	9.3041	20.9307	11.8007	7.9546	14.0343
		4	4	2	10.5429	19.8369	11.6094	7.2314	12.9837
		1	5	2	11.2549	21.4337	12.0348	7.6194	13.2513
		2	5	2	11.0149	21.6654	10.9695	—	13.4061
		3	5	2	11.2674	18.7003	12.4278	8.656	14.2649
		4	5	2	12.0134	22.021	12.6229	10.7823	13.4675
		1	6	2	11.7833	24.6057	11.977	8.5102	16.1996
		2	6	2	10.4666	24.4635	12.7686	10.2683	13.9156
		3	6	2	12.6277	23.2359	12.4589	8.6969	13.6247
		4	6	2	13.7801	23.4598	12.2953	9.6175	14.6726
		1	7	2	11.2445	21.8539	12.8447	7.825	7.8652
		2	7	2	10.8981	22.7713	12.8276	7.5415	12.2989
		3	7	2	10.5477	20.5519	11.1707	7.2482	12.8687
		4	7	2	9.3902	20.8232	11.3045	6.5405	13.2218
		1	8	2	10.252	21.5709	13.2201	9.7801	12.6701
		2	8	2	12.5379	21.1387	12.7639	8.6322	13.3934
		3	8	2	9.4883	20.3205	11.7145	7.2621	13.5813
		4	8	2	10.5477	20.9879	12.5586	6.3319	13.2583
		1	9	2	12.9183	23.2346	12.6688	7.3008	15.2574
		2	9	2	10.1468	20.2213	12.3123	7.9913	13.1477
		3	9	2	10.8589	20.5448	13.0787	8.8594	12.6201
		4	9	2	9.0828	18.1576	10.1505	7.9365	11.77

## Sheet: ADF
		ADF（%）
		Rep!	Trt!	CUT!	Gramineae	Leguminosae	Sedges	Wilted grass	Weeds
		1	1	2	39.0052	33.1976	37.9578	41.7659	41.8638
		2	1	2	41.3294	27.6133	38.0172	44.6306	42.2312
		3	1	2	38.5661	30.1025	36.0274	45.4887	35.8801
		4	1	2	44.2051	32.2509	38.9612	45.4047	37.7084
		1	2	2	41.96	36.277	41.3217	42.7296	44.5564
		2	2	2	40.0475	33.8262	39.0497	41.3491	35.933
		3	2	2	41.2402	29.1513	37.9439	43.6361	36.079
		4	2	2	42.9214	27.7825	38.6431	41.2992	40.3359
		1	3	2	36.34	33.7924	41.7867	46.8107	43.5406
		2	3	2	40.6288	29.1377	33.8456	48.3929	44.2997
		3	3	2	45.7518	31.1213	38.5781	39.2379	46.1955
		4	3	2	40.9982	31.6158	37.4994	44.8317	37.8862
		1	4	2	38.2577	27.3574	36.8721	42.7971	40.3944
		2	4	2	40.224	45.7561	43.9255	48.7784	43.8352
		3	4	2	37.8306	24.6995	31.8921	42.521	40.874
		4	4	2	37.6137	31.5043	37.9654	44.671	38.1372
		1	5	2	40.0893	28.5296	40.6139	47.9652	44.3108
		2	5	2	42.2854	33.3331	39.8093	44.4108	34.5441
		3	5	2	39.8994	22.3739	32.0727	43.6627	42.2864
		4	5	2	38.9002	35.5633	41.8574	33.8854	38.1969
		1	6	2	40.8397	38.0704	41.7704	44.0461	36.6587
		2	6	2	44.7701	34.7766	42.1944	47.0742	36.0194
		3	6	2	40.6746	29.1357	33.4066	39.7166	38.3531
		4	6	2	43.2995	28.6757	43.4423	43.3521	33.5236
		1	7	2	45.1376	39.459	41.7839	47.5268	45.0774
		2	7	2	40.9286	31.8568	34.8174	44.3231	43.5945
		3	7	2	42.6691	39.3539	39.0725	48.5851	39.8588
		4	7	2	34.9362	20.7698	34.0175	41.7815	31.4555
		1	8	2	46.6383	31.0296	40.1623	42.6504	42.5283
		2	8	2	37.3562	27.6804	37.9022	41.6383	38.7162
		3	8	2	44.4537	34.994	39.9996	49.1876	38.1451
		4	8	2	41.6255	32.0083	35.8589	47.0893	36.188
		1	9	2	44.5658	39.7539	45.2186	48.516	55.3917
		2	9	2	36.7745	30.6878	33.0021	41.8171	35.0063
		3	9	2	41.0508	26.2095	34.1748	39.6199	40.2013
		4	9	2	46.4403	38.6242	37.946	43.3645	40.9254

## Sheet: DMD
		DMD%
		Rep!	Trt!	CUT!	Gramineae	Leguminosae	Sedges	Weeds
		1	1	2	47.4351	72.8035	—	58.8656
		2	1	2	52.4215	66.9094	52.5953	62.8091
		3	1	2	42.8341	75.0327	—	60.2527
		4	1	2	47.5333	81.5229	51.3319	65.0124
		1	2	2	44.3961	68.6662	51.6973	57.3422
		2	2	2	50.1085	70.9944	43.3077	57.2249
		3	2	2	43.213	69.6909	46.9988	67.7418
		4	2	2	51.756	71.4535	—	63.9852
		1	3	2	38.0165	56.576	—	53.7324
		2	3	2	53.4365	74.6441	48.0947	57.8916
		3	3	2	39.269	76.932	44.3285	58.5922
		4	3	2	35.0451	69.184	—	53.1938
		1	4	2	35.9634	61.215	47.5076	43.3594
		2	4	2	43.4678	75.8427	55.1799	62.4109
		3	4	2	—	62.345	—	56.1865
		4	4	2	41.7457	73.9937	42.6624	48.5926
		1	5	2	41.3054	66.0994	49.3222	60.0939
		2	5	2	38.275	72.9706	57.5835	57.017
		3	5	2	42.6814	74.4465	—	49.7695
		4	5	2	32.8711	—	—	67.8568
		1	6	2	45.0583	60.7624	50.3079	54.4112
		2	6	2	38.9509	69.1844	51.8262	58.7876
		3	6	2	37.5134	79.3135	46.129	66.5222
		4	6	2	39.1047	75.567	—	73.3008
		1	7	2	46.3418	70.872	56.1344	54.123
		2	7	2	32.4369	80.9167	47.8916	58.1753
		3	7	2	45.2128	76.8392	53.9893	66.6856
		4	7	2	36.7799	80.7416	45.0455	66.7497
		1	8	2	46.3418	70.872	56.1344	54.123
		2	8	2	39.8425	71.5857	47.0368	51.3955
		3	8	2	39.6703	72.547	48.0416	65.0681
		4	8	2	32.1294	—	—	70.6786
		1	9	2	53.8098	73.2009	48.9044	55.1001
		2	9	2	37.214	80.8045	47.5566	62.44
		3	9	2	38.7091	77.26	38.7256	62.1468
		4	9	2	36.8374	71.5985	44.0097	56.6547
